# Supplementary material for: Role of SPAK–NKCC1 signaling cascade in the choroid plexus blood–CSF barrier damage after stroke
Source: PubMed Central journal article supplement (PMC9006540; doi:10.1186/s12974-022-02456-4), 2022-04-12

# **Role of SPAK-NKCC1 signaling cascade in the choroid plexus blood-CSF barrier damage after stroke**

Jun Wang<sup>1,2</sup>, Ruijia Liu<sup>2</sup>, Md Nabiul Hasan<sup>2,8</sup>, Sydney Fischer<sup>2</sup>, Yang Chen<sup>1,2</sup>, Matt Como<sup>3</sup>, Victoria M Fiesler<sup>2</sup>, Mohammad Iqbal H. Bhuiyan<sup>2,8</sup>, Shuying Dong<sup>2</sup>, Eric Li<sup>2</sup>, Kristopher T Kahle<sup>4</sup>, Jinwei Zhang<sup>5</sup>, Xianming Deng<sup>6</sup>, Arohan R Subramanya<sup>7,8</sup>, Gulnaz Begum<sup>2,8</sup>, Yan Yin<sup>1\*</sup>, Dandan Sun<sup>2,8\*</sup>

<sup>1</sup>Department of Neurology, The Second Hospital of Dalian Medical University, Dalian, Liaoning, China

<sup>2</sup>Department of Neurology, University of Pittsburgh, Pittsburgh, PA, USA

<sup>3</sup>Pennsylvania State University, State College, PA, USA.

<sup>4</sup>Department of Neurosurgery, The Massachusetts General Hospital and Harvard Medical School, Boston, MA, USA

<sup>5</sup>Institute of Biomedical and Clinical Sciences, Medical School, College of Medicine and Health, University of Exeter, Hatherly Laboratory, Exeter, EX4 4PS, UK

<sup>6</sup>State Key Laboratory of Cellular Stress Biology, Innovation Center for Cell Signaling Network, School of Life Sciences, Xiamen University, Xiamen, Fujian, China

<sup>7</sup>Department of Medicine, Renal-Electrolyte Division, University of Pittsburgh School of Medicine, Pittsburgh, PA, USA

<sup>8</sup> Research Service, Veterans Affairs Pittsburgh Health Care System, Pittsburgh, PA, USA

**Running title: SPAK-NKCC1 complex in the blood-CSF barrier**

**\*Address correspondence to:**

Dandan Sun, M.D., Ph.D.

Department of Neurology

University of Pittsburgh

7016 Biomedical Science Tower 3, 3501 Fifth Ave.

Pittsburgh, PA 15260

Tel: (412) 624-0418, Fax: (412) 648-3321

E-mail address: [sund@upmc.edu](mailto:sund@upmc.edu)

Yan Yin, M.D., Ph.D.

Department of Neurology

The Second Hospital of Dalian Medical University

Dalian, Liaoning, China 116027

E-mail address: [yanyin1208@126.com](mailto:yanyin1208@126.com)

SPAK-NKCC1 blot of isolated ChP in **Figure 2f**.

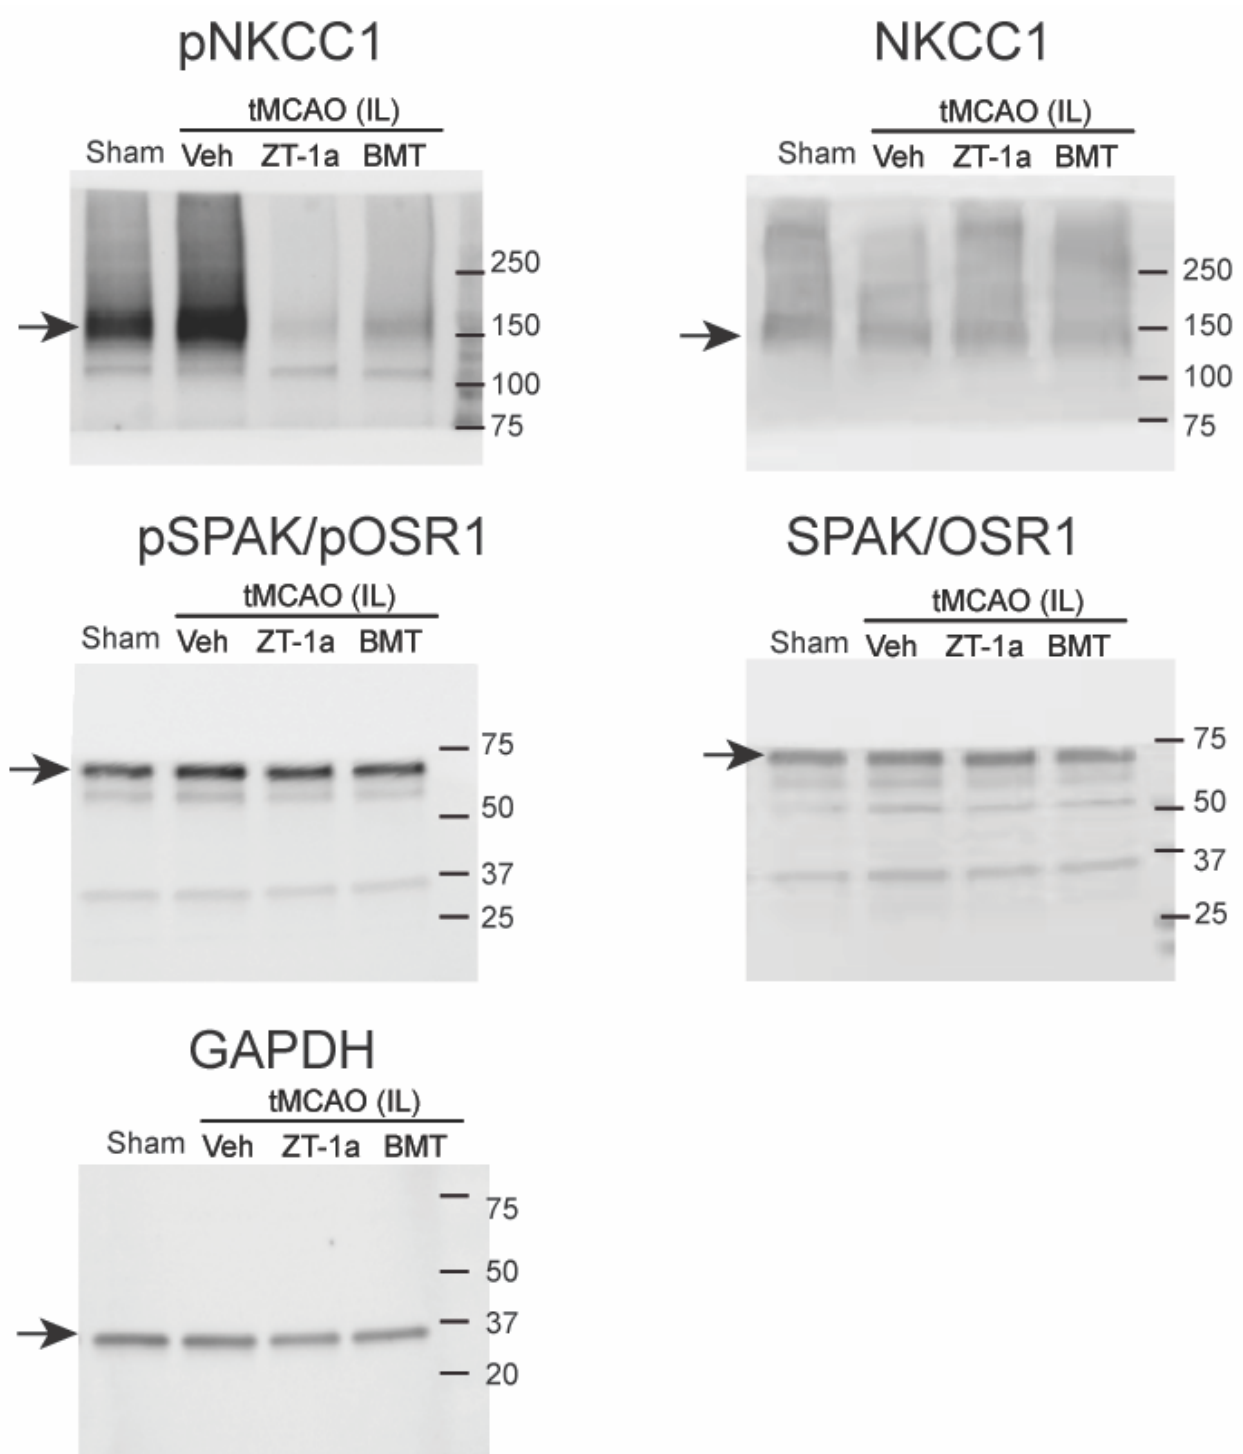

Claudin-1, Claudin-5 and ZO-1 blot of isolated ChP in **Figure 3e**.

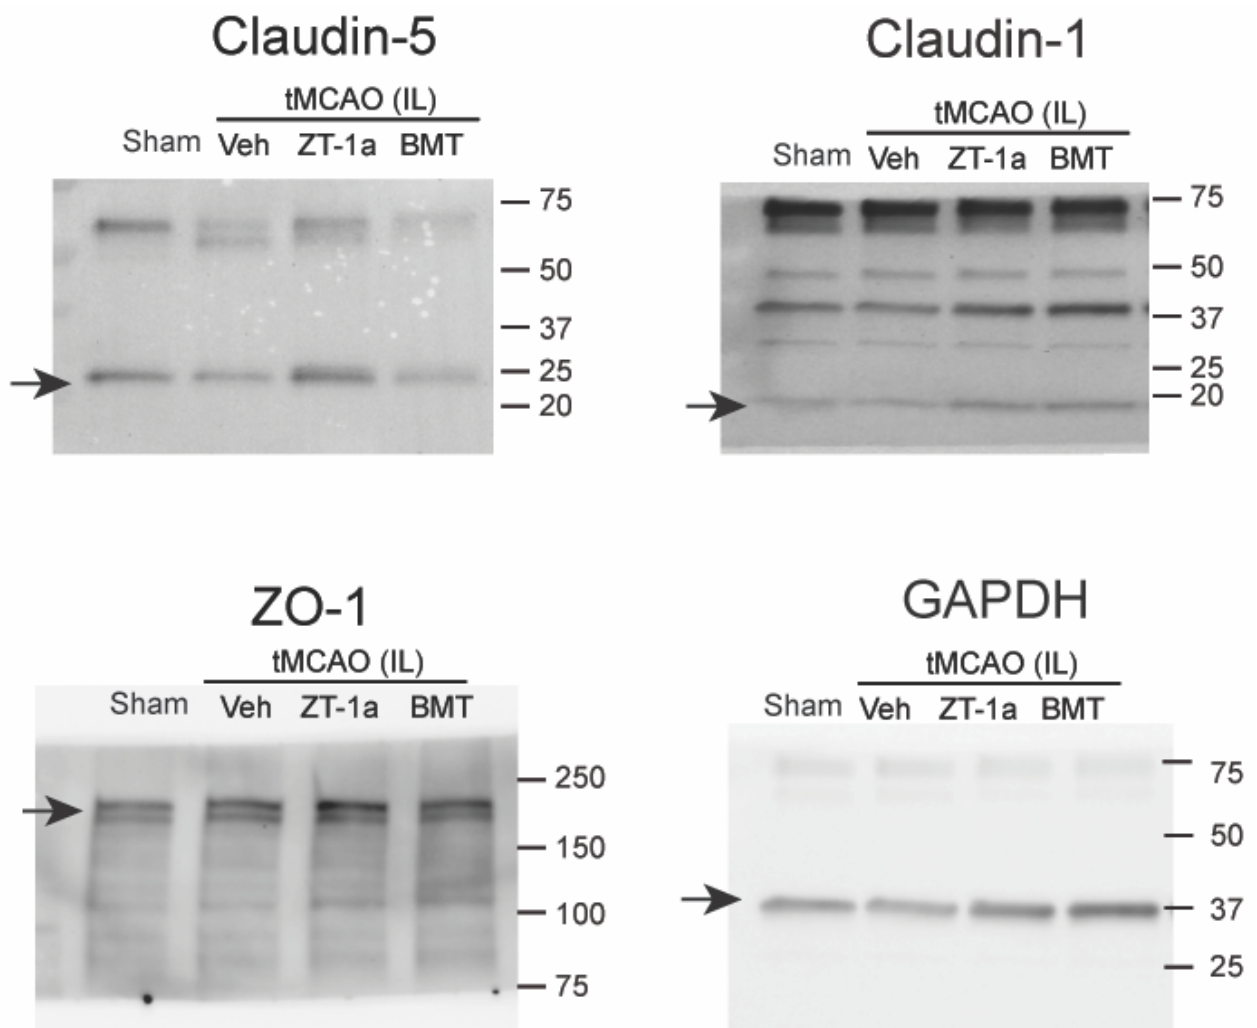

NF- $\kappa$ B and MMP9 blot of isolated ChP in **Figure 4e**.

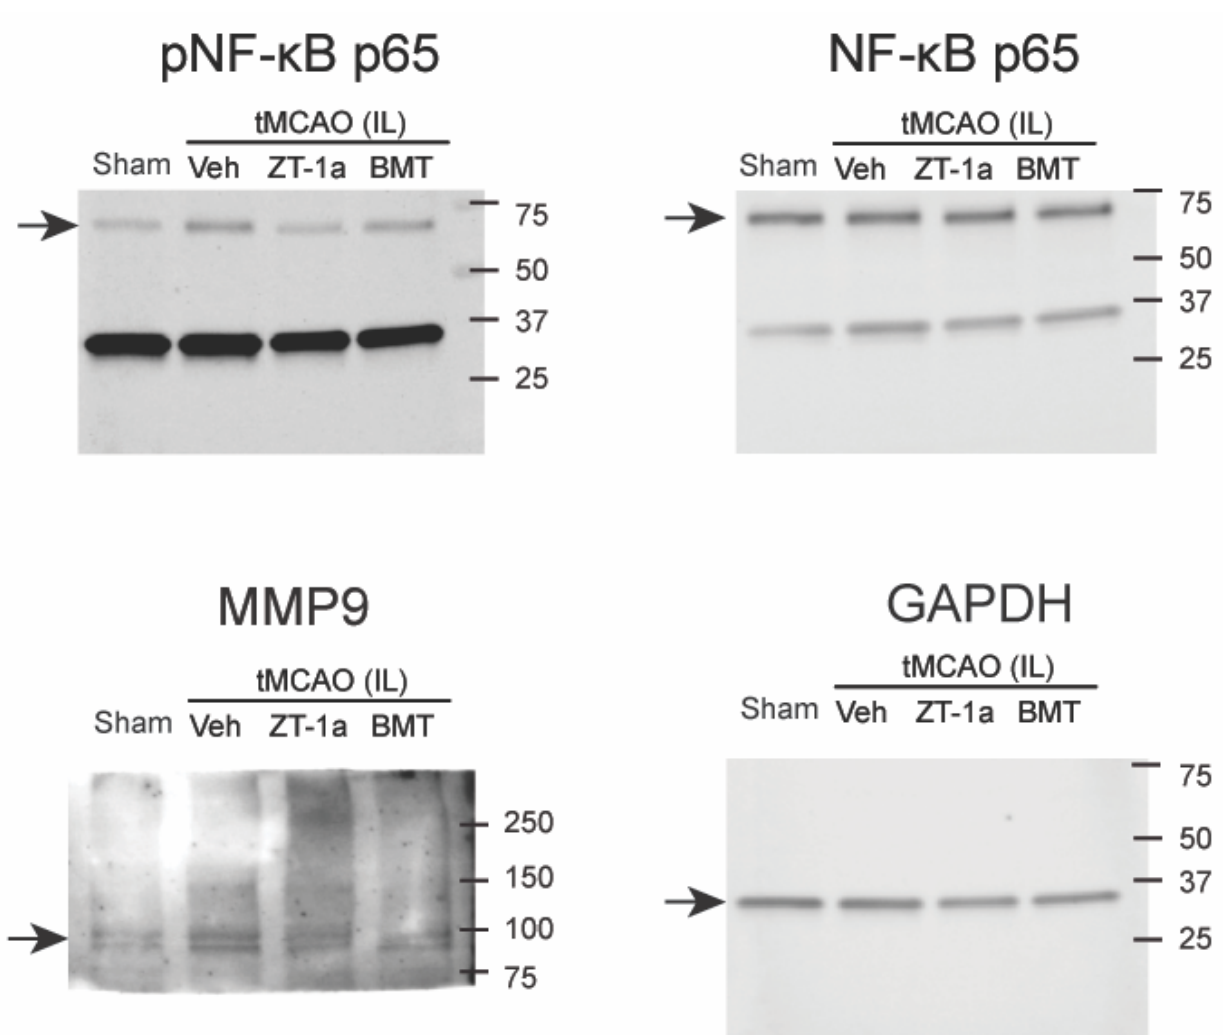

SPAK-NKCC1 blot of cultured neurons in **Figure 7g**.

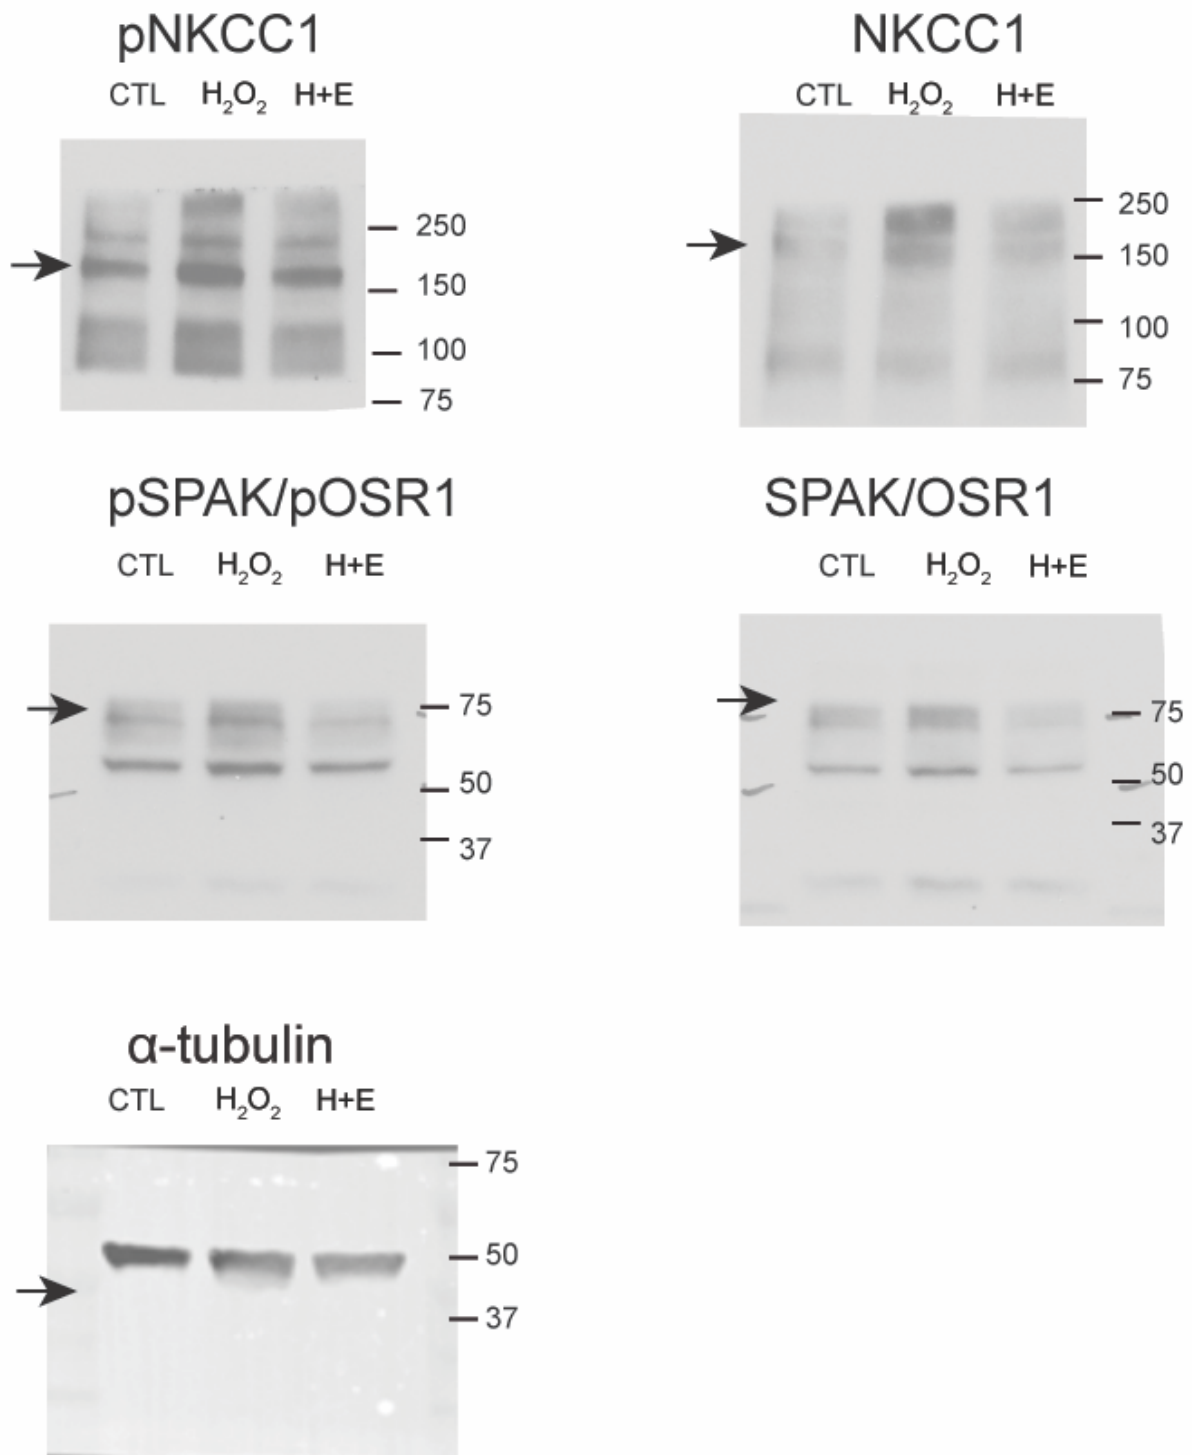

SPAK-NKCC1 blot of cultured neurons in **Figure 7i**.

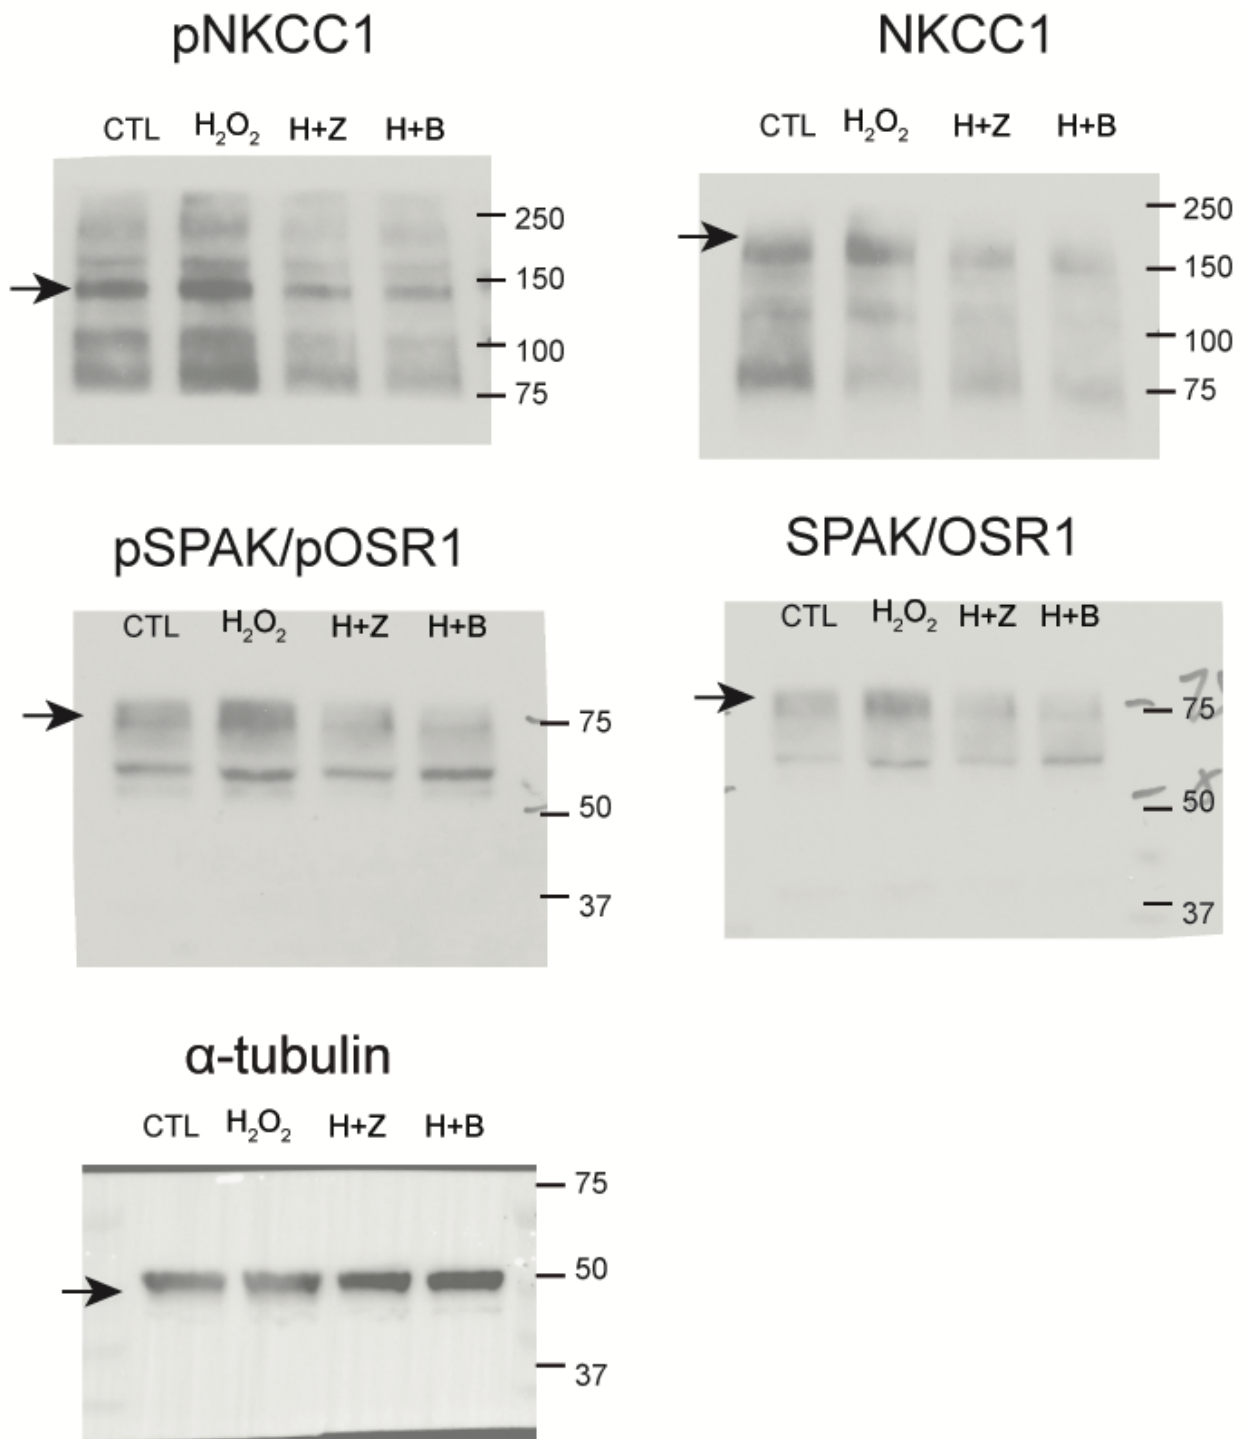

SPAK-NKCC1 blot of isolated ChP in **Supplementary Figure 2d**.

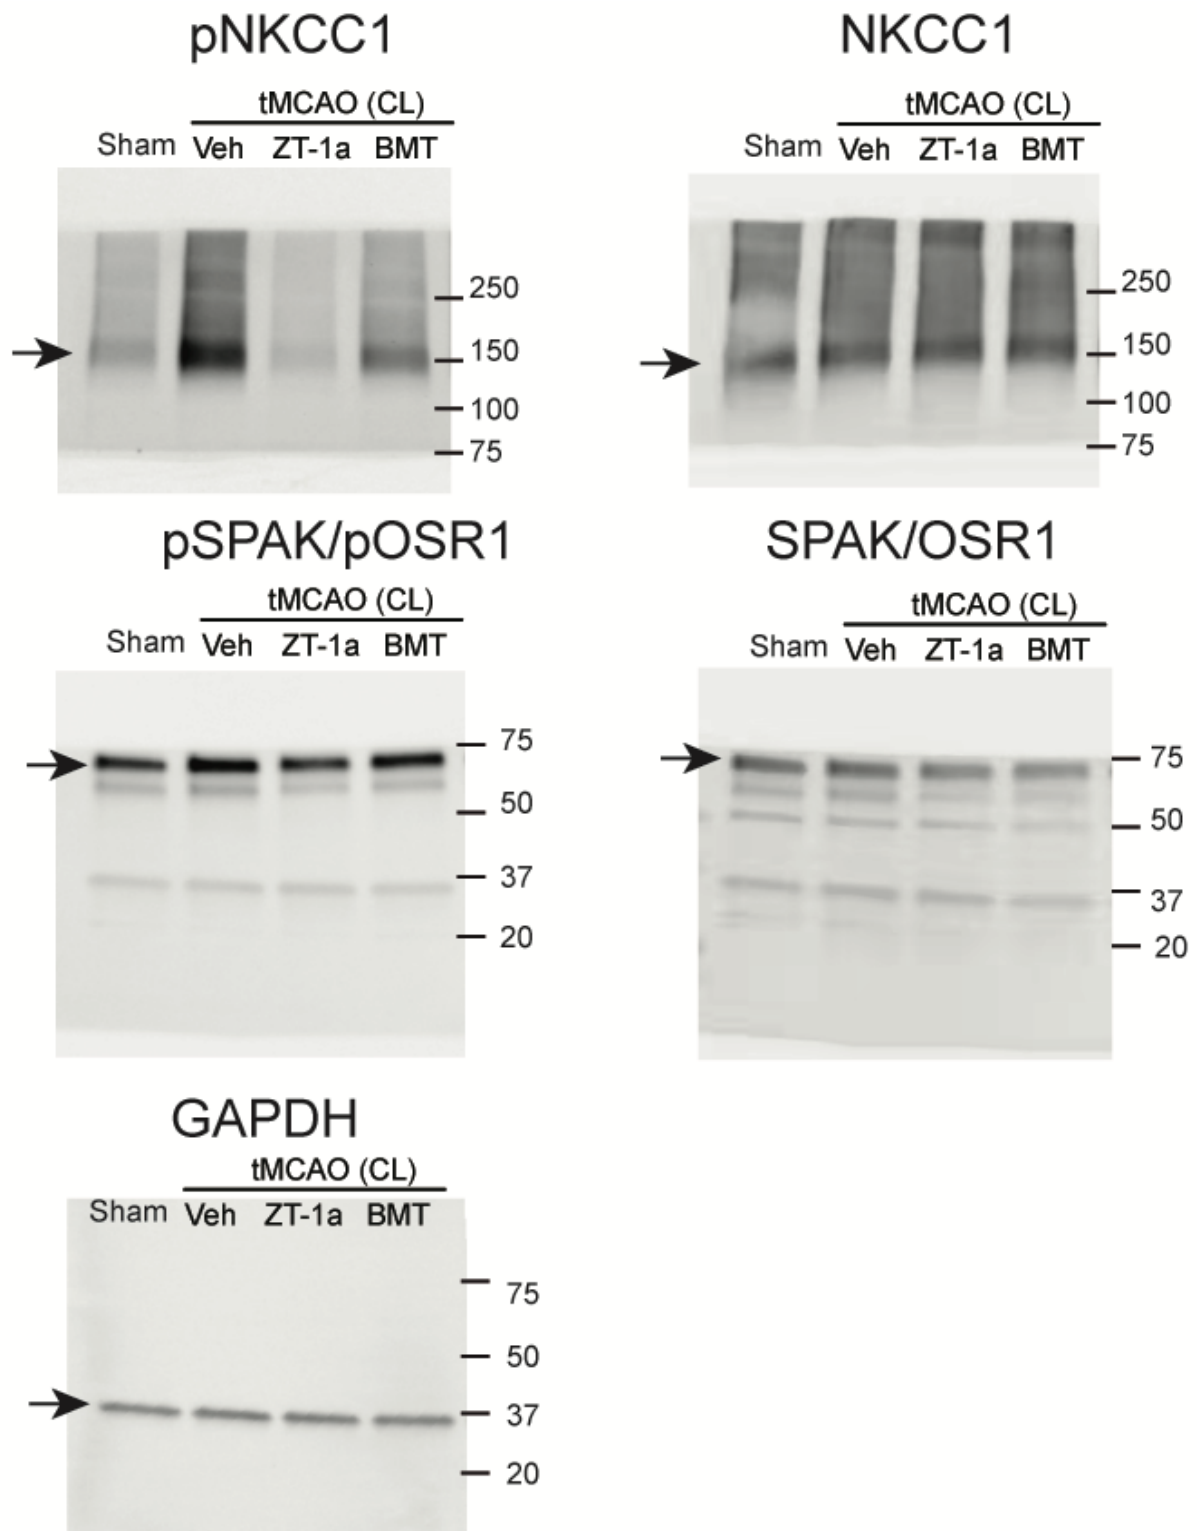

NF- $\kappa$ B and MMP9 blot of isolated ChP in **Supplementary Figure 5e**.

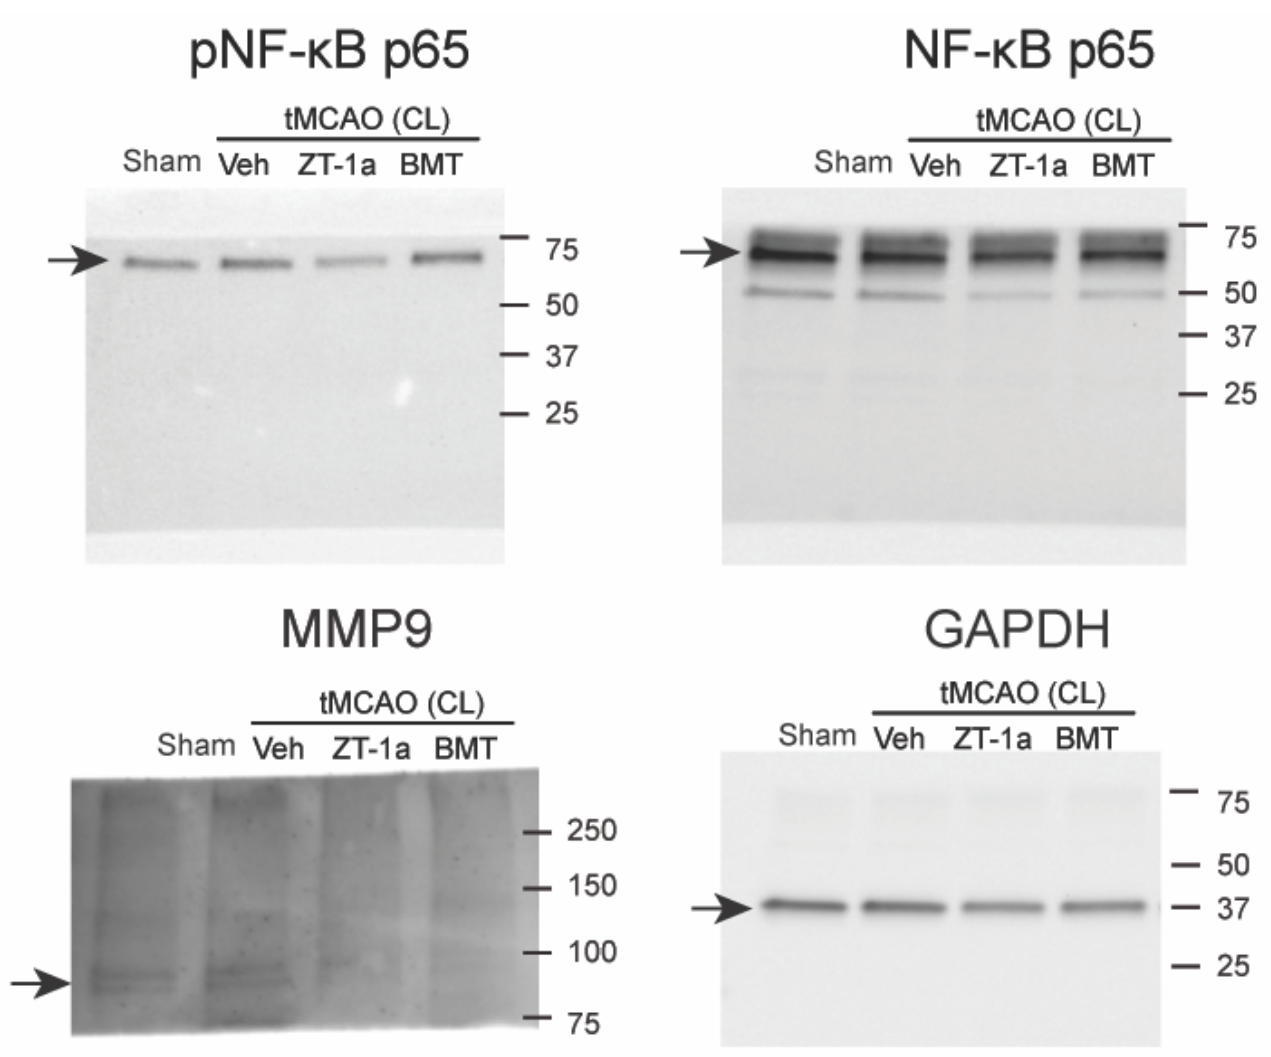

Supplement: 12974_2022_2456_MOESM1_ESM.pdf [file 12974_2022_2456_MOESM1_ESM.pdf]
